# Supplementary material for: Engineered immunogens to elicit antibodies against conserved coronavirus epitopes
Source: PubMed Central journal article supplement (PMC10689493; doi:10.1038/s41467-023-43638-9), 2023-11-30
Supplement: 41467_2023_43638_MOESM1_ESM.pdf [file 41467_2023_43638_MOESM1_ESM.pdf]

# 1 Supplementary Online Materials

**Supplementary Table 1: Data collection and refinement statistics**

|                                                     | S2hlx EX 19              | S2hlx 7-DH1057.1       | FP15 DH1058             |
|-----------------------------------------------------|--------------------------|------------------------|-------------------------|
| <b>Data collection</b>                              |                          |                        |                         |
| Space group                                         | <i>C</i> 2               | <i>P</i> 1             | <i>P</i> 2 <sub>1</sub> |
| Cell dimensions                                     |                          |                        |                         |
| <i>a</i> , <i>b</i> , <i>c</i> (Å)                  | 175.62, 28.66, 65.49     | 56.68, 76.36, 79.02    | 48.39, 50.58, 146.24    |
| $\alpha$ , $\beta$ , $\gamma$ (°)                   | 90.00, 106.66, 90.00     | 71.60, 69.99, 88.30    | 90.00, 96.89, 90.00     |
| Resolution (Å)                                      | 44.55-2.30 (2.38-2.30) * | 45.68-1.90 (1.97-1.90) | 47.33-2.20 (2.28-2.20)  |
| <i>R</i> <sub>merge</sub>                           | 0.705 (1.651)            | 0.664 (0.933)          | 0.745 (1.051)           |
| <i>I</i> / $\sigma$ <i>I</i>                        | 16.1 (2.4)               | 29.1 (3.2)             | 23.6 (2.3)              |
| Completeness (%)                                    | 95.1 (92.6)              | 93.9 (87.6)            | 98.2 (98.6)             |
| Redundancy                                          | 13.5 (14.0)              | 4.7 (3.7)              | 7.5 (7.5)               |
| <b>Refinement</b>                                   |                          |                        |                         |
| Resolution (Å)                                      | 44.55-2.30 (2.38-2.30)   | 44.66-1.90 (1.96-1.90) | 47.33-2.20 (2.27-2.20)  |
| No. reflections                                     | 13,713 (1,340)           | 87,255 (8,122)         | 35,397 (3,494)          |
| <i>R</i> <sub>work</sub> / <i>R</i> <sub>free</sub> | 0.254/0.275              | 0.211/0.245            | 0.189/0.229             |
| No. atoms                                           |                          |                        |                         |
| Protein                                             | 2,212                    | 8,003                  | 4,264                   |
| Ligand/ion                                          | 0                        | 111                    | 0                       |
| Water                                               | 69                       | 1,353                  | 189                     |
| <i>B</i> -factors                                   |                          |                        |                         |
| Protein                                             | 45.6                     | 24.7                   | 61.6                    |
| Ligand/ion                                          |                          | 44.0                   |                         |
| Water                                               | 46.4                     | 31.6                   | 49.5                    |
| R.m.s. deviations                                   |                          |                        |                         |
| Bond lengths (Å)                                    | 0.007                    | 0.008                  | 0.006                   |
| Bond angles (°)                                     | 1.00                     | 0.86                   | 0.85                    |

2 \*Values in parentheses are for highest-resolution shell.

3

|                       | Patient # | Vaccine                   | Days post vaccination | COVID strain | Variant of concern | Days post symptom onset |
|-----------------------|-----------|---------------------------|-----------------------|--------------|--------------------|-------------------------|
| Vaccinated            | 1         | Ad26.Cov2.S plus BNT162b2 | 42                    |              |                    |                         |
|                       | 2         | mRNA-1273                 | 28                    |              |                    |                         |
|                       | 3         | mRNA-1273                 | 29                    |              |                    |                         |
|                       | 4         | mRNA-1273                 | 20                    |              |                    |                         |
|                       | 5         | mRNA-1273                 | 14                    |              |                    |                         |
|                       | 6         | mRNA-1273                 | 44                    |              |                    |                         |
|                       | 7         | mRNA-1273                 | 13                    |              |                    |                         |
|                       | 8         | BNT162b2                  | 52                    |              |                    |                         |
|                       | 9         | BNT162b2                  | 33                    |              |                    |                         |
|                       | 10        | BNT162b2                  | 26                    |              |                    |                         |
|                       | 11        | BNT162b2                  | 26                    |              |                    |                         |
|                       | 12        | BNT162b2                  | 33                    |              |                    |                         |
| Infected              | 13        |                           |                       | B.1.2        |                    | 21                      |
|                       | 14        |                           |                       | B.1.2        |                    | 28                      |
|                       | 15        |                           |                       | AY.103       | DELTA              | 14                      |
|                       | 16        |                           |                       | AY.118       | DELTA              | 21                      |
|                       | 17        |                           |                       | AY.44        | DELTA              | 21                      |
|                       | 18        |                           |                       | AY.118       | DELTA              | 28                      |
|                       | 19        |                           |                       | AY.44        | DELTA              | 28                      |
|                       | 20        |                           |                       | BA.1.1       | OMICRON            | 21                      |
|                       | 21        |                           |                       | BA.1.1       | OMICRON            | 21                      |
|                       | 22        |                           |                       | BA.1.1       | OMICRON            | 28                      |
|                       | 23        |                           |                       | BA.1.1       | OMICRON            | 28                      |
|                       | 24        |                           |                       | BA.1.1       | OMICRON            | 7                       |
| Vaccinated + Infected | 25        | Ad26.Cov2.S               | 51                    | AY.103       | DELTA              | 14                      |
|                       | 26        | Ad26.Cov2.S               | 192                   | AY.44        | DELTA              | 21                      |
|                       | 27        | Ad26.Cov2.S               | 137                   | AY.103       | DELTA              | 21                      |
|                       | 28        | Ad26.Cov2.S               | 96                    | AY.44        | DELTA              | 28                      |
|                       | 29        | Ad26.Cov2.S               | 193                   | BA.1.1       | OMICRON            | 28                      |
|                       | 30        | mRNA-1273                 | 376                   | BA.1.1       | OMICRON            | 21                      |
|                       | 31        | BNT162b2                  | 65                    | B.1.1.207    |                    | 28                      |
|                       | 32        | BNT162b2                  | 38                    | AY.44        | DELTA              | 21                      |
|                       | 33        | BNT162b2                  | 131                   | AY.44        | DELTA              | 28                      |
|                       | 34        | BNT162b2                  | 41                    | AY.44        | DELTA              | 28                      |
|                       | 35        | BNT162b2                  | 516                   | BA.2.12.1    | OMICRON            | 28                      |
|                       | 36        | BNT162b2                  | 437                   | BA.2.12.1    | OMICRON            | 28                      |

4

5 **Supplementary Table 2. SARS-CoV-2 strain and vaccine information of patient**  
6 **samples analyzed for binding to native protein domains and the engineered epitope**  
7 **scaffolds.**

8

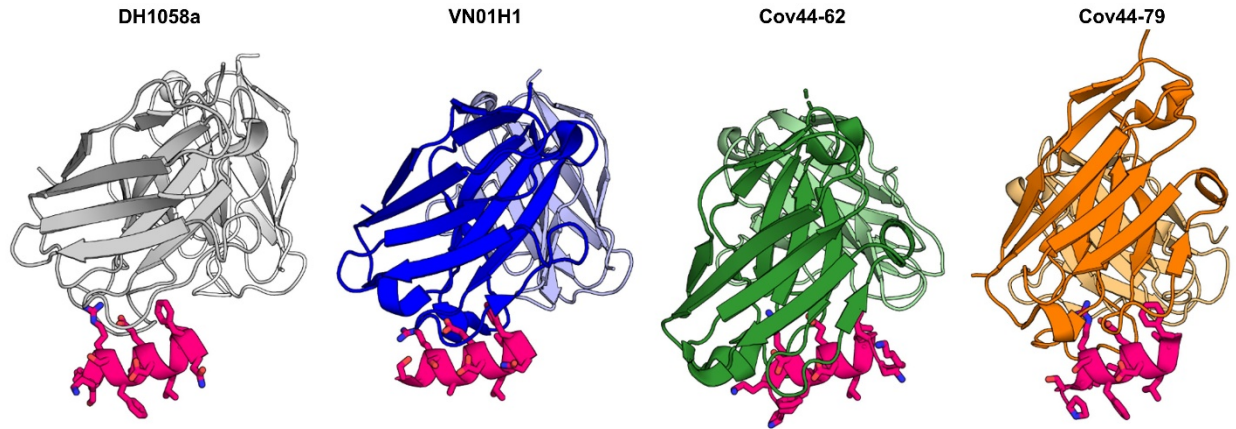

9

10           **Supplementary Figure 1. Antibodies with broad recognition against diverse**  
11 **coronaviruses target the conserved spike<sup>815-823</sup> epitope of SARS-CoV-2.** Known structures of  
12 DH1058 (*grey*), VN01H1 (*blue*), Cov44-62 (*green*), and Cov44-79 (*orange*) mAbs bound to their  
13 spike epitope (*magenta*). Epitopes are centered on residues 813-824 with key contacts made with  
14 virus residues R815, E819 and F823.

15

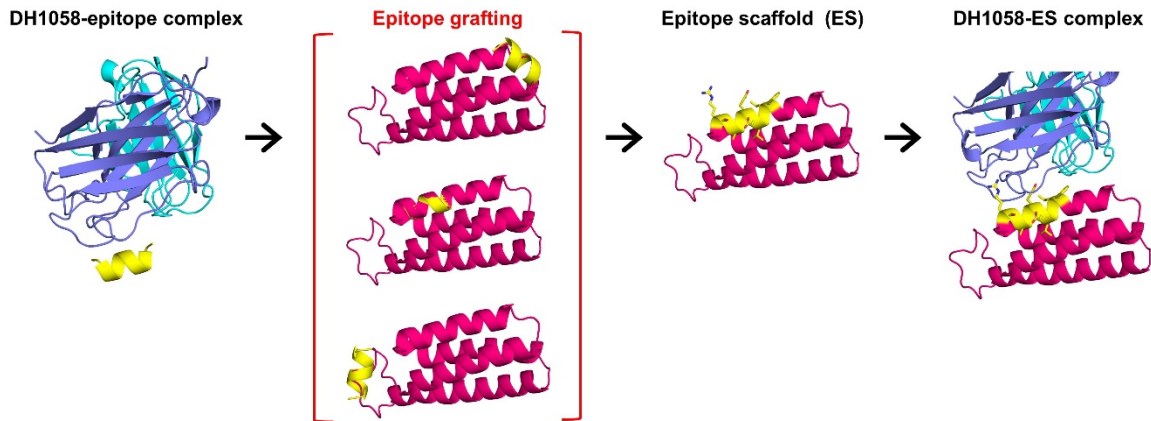

16

17 **Supplementary Figure 2. Workflow for computational design of spike<sup>815-823</sup> epitope**

18 **scaffolds by side chain grafting.** Using the crystal structure of antibody DH1058 (*light purple*

19 and *cyan*) bound to its epitope (*yellow*), candidate scaffolds (*magenta*) were queried

20 computationally to identify proteins with exposed backbone regions that closely matched (<0.5Å

21 RMS) the structure of the antibody-bound epitope. On proteins that have regions with high

22 structural mimicry to the DH1058-bound epitope, the epitope sequence (*yellow*) replaced the

23 native scaffold to generate an epitope scaffold (ES); additional mutations were introduced into the

24 scaffold to accommodate the grafted epitope, to prevent clashes with the DH1058 mAb in the

25 modeled antibody-ES complex, and to revert any unnecessary scaffold mutations introduced at

26 the automated computational design stage.

27

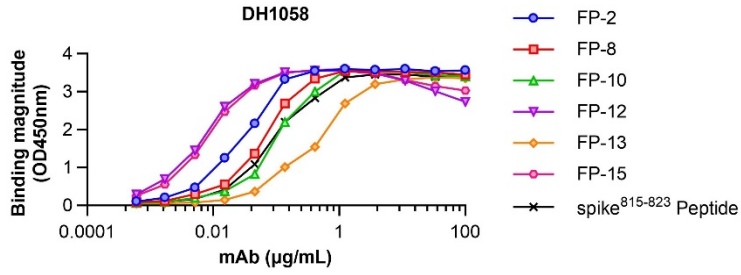

28

29

**Supplementary Figure 3. Initial binding screen of designed spike<sup>815-823</sup> epitope**

30

**scaffolds to DH1058 mAb.** ELISA binding of DH1058 mAb to immobilized epitope scaffolds and

31

a synthetic peptide encompassing the spike<sup>815-823</sup> epitope (SARS-CoV-2 spike residues 808-833).

32

Source data are provided as a Source Data file.

33

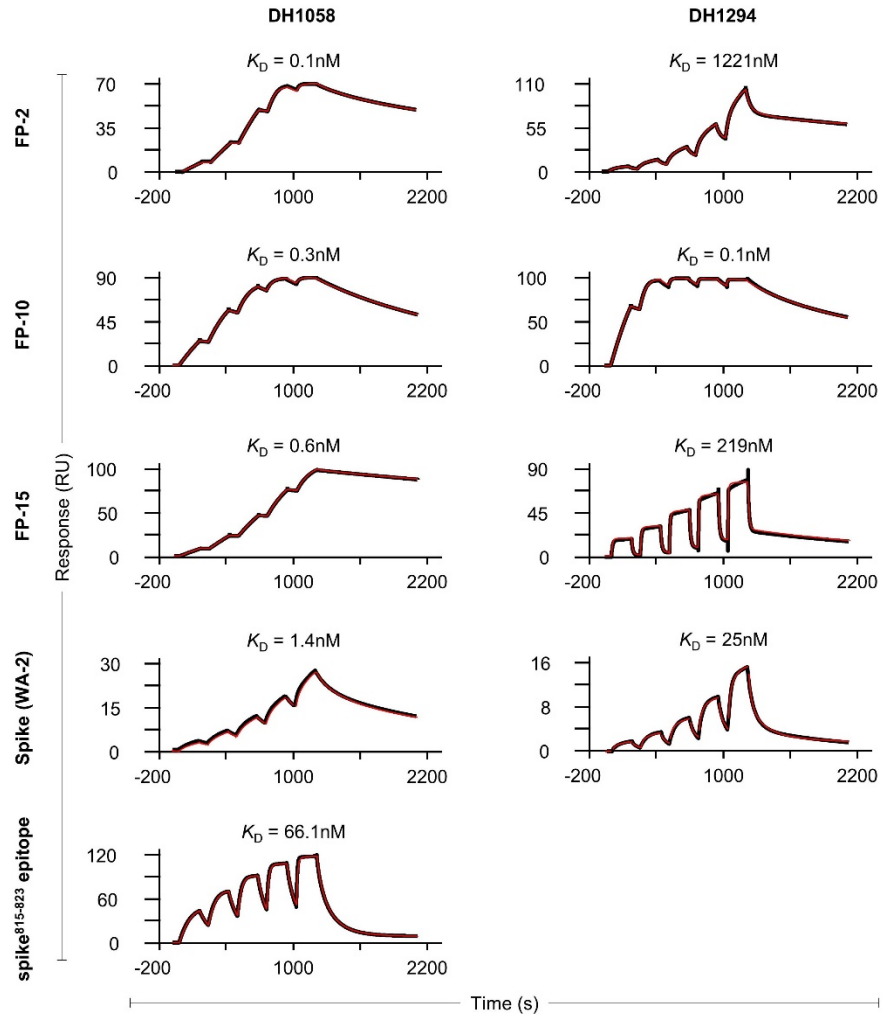

34

35

**Supplementary Figure 4. Surface Plasmon Resonance binding curves to determine**

36

**the dissociation constants of spike<sup>815-823</sup> epitope scaffolds for DH1058 and DH1294 mAbs.**

37

Acquired data is shown in *black* and the curve fit is in *red*. Data is representative of at least two

38

independent experiments.

39

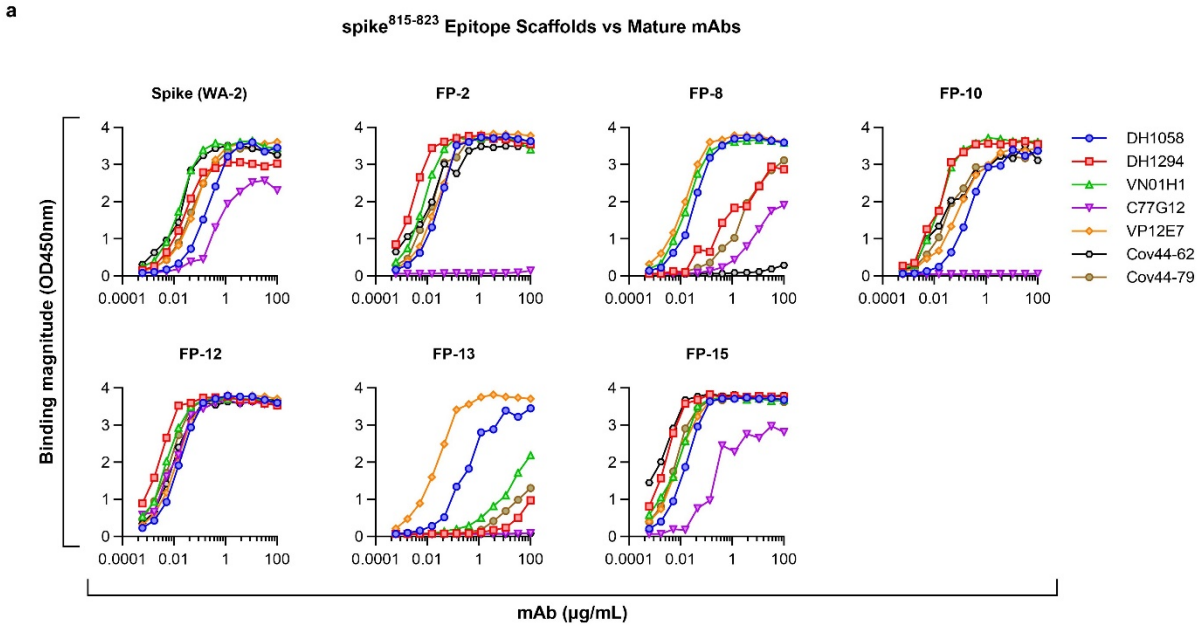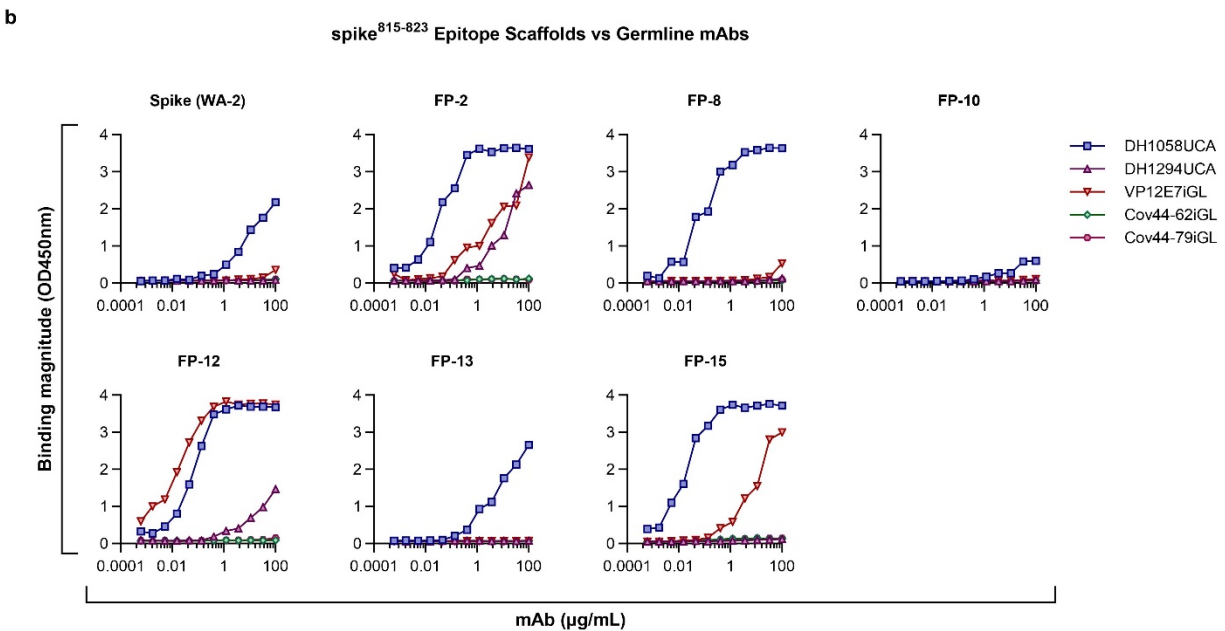

40

41

**Supplementary Figure 5. Epitope scaffolds bind to diverse mature and germline**

42

**antibodies that target the spike<sup>815-823</sup> epitope. (a) ELISA binding of mAbs DH1058, DH1294,**

43

**VN01H1, C77G12, VP12E7, Cov44-62, and Cov44-79 to FP ESs and to a synthetic peptide**

44

**encompassing the spike<sup>815-823</sup> epitope (SARS-CoV-2 spike residues 808-833). (b) ELISA binding**

45

**of mAbs DH1058UCA, DH1294UCA, VP12E7iGL, Cov44-62iGL, and Cov44-79iGL to FP ESs**

46 and to a synthetic peptide encompassing the spike<sup>815-823</sup> epitope (SARS-CoV-2 spike residues  
47 808-833). Source data are provided as a Source Data file.

48



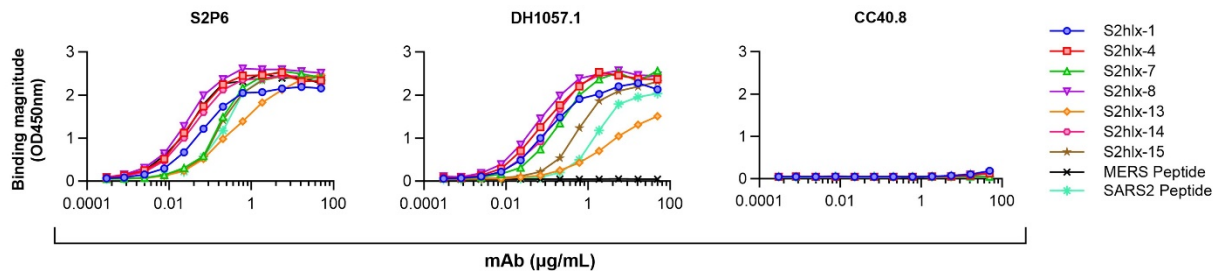

49

50 **Supplementary Figure 6. S2hlx ESs bind to S2P6 and DH1057.1 mAbs, but not to**  
 51 **CC40.8 mAb.** ELISA binding of mAbs S2P6, DH1057.1 and CC40.8 to S2hlx ESs measured by  
 52 ELISA. Binding was compared to that of synthetic stem helix peptides derived from SARS-CoV2  
 53 (<sup>1147</sup>SFKEELDKYFKNHTS<sup>1161</sup>) and MERS (<sup>1230</sup>DFQDELDEFFKNVST<sup>1244</sup>). The synthetic peptide  
 54 did not contain residue L1145 (SARS-CoV-2 numbering) that is critical for epitope binding by  
 55 CC40.8. Source data are provided as a Source Data file.

56

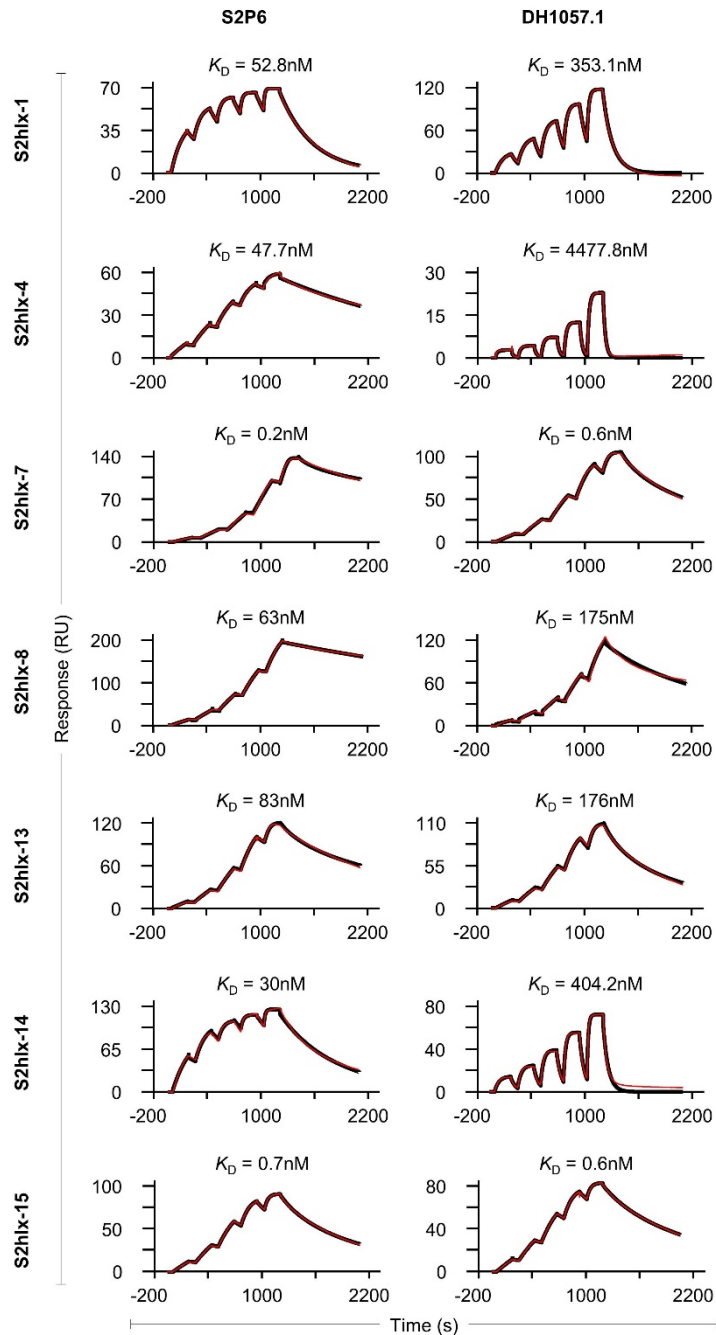

57

58 **Supplementary Figure 7. Surface Plasmon Resonance curves of S2hlx epitope**

59 **scaffolds binding to S2P6, S2P6iGL, DH1057.1 and DH1057UCA mAbs. Acquired data is**

60 **shown in *black* and the curve fit is in *red*.**

61

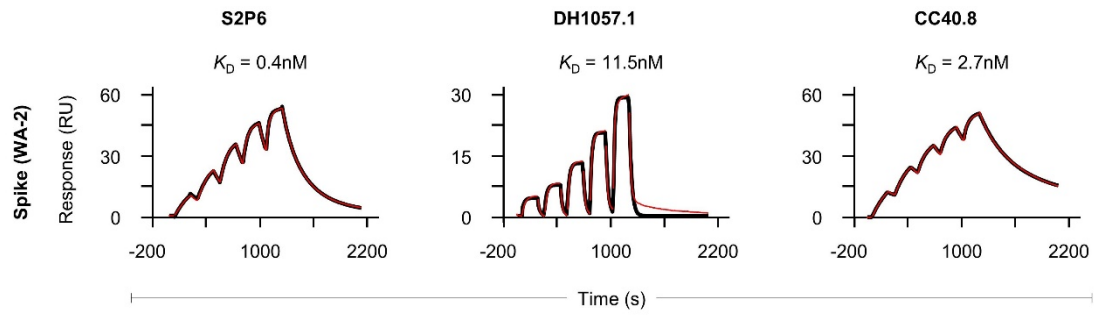

62

63 **Supplementary Figure 8. Surface Plasmon Resonance curves of Spike (WA-2)**

64 **proteins binding to S2P6, DH1057.1 and CC40.8 mAbs.** Acquired data is shown in *black* and

65 the curve fit is in *red*.

66

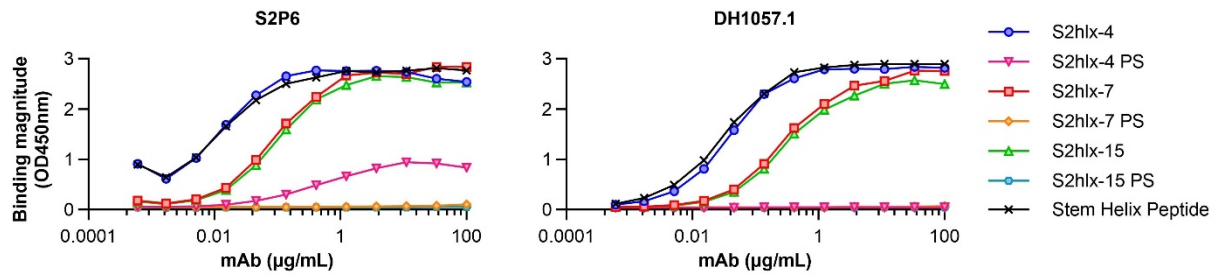

67

68 **Supplementary Figure 9. Binding of S2hlx epitope scaffolds to target antibodies is**  
 69 **mediated by the grafted epitope residues.** ELISA binding of S2P6 and DH1057.1 mAbs to  
 70 S2hlx epitope scaffolds and to the parent scaffolds (PS) that served as templates for epitope  
 71 grafting. Source data are provided as a Source Data file.

72

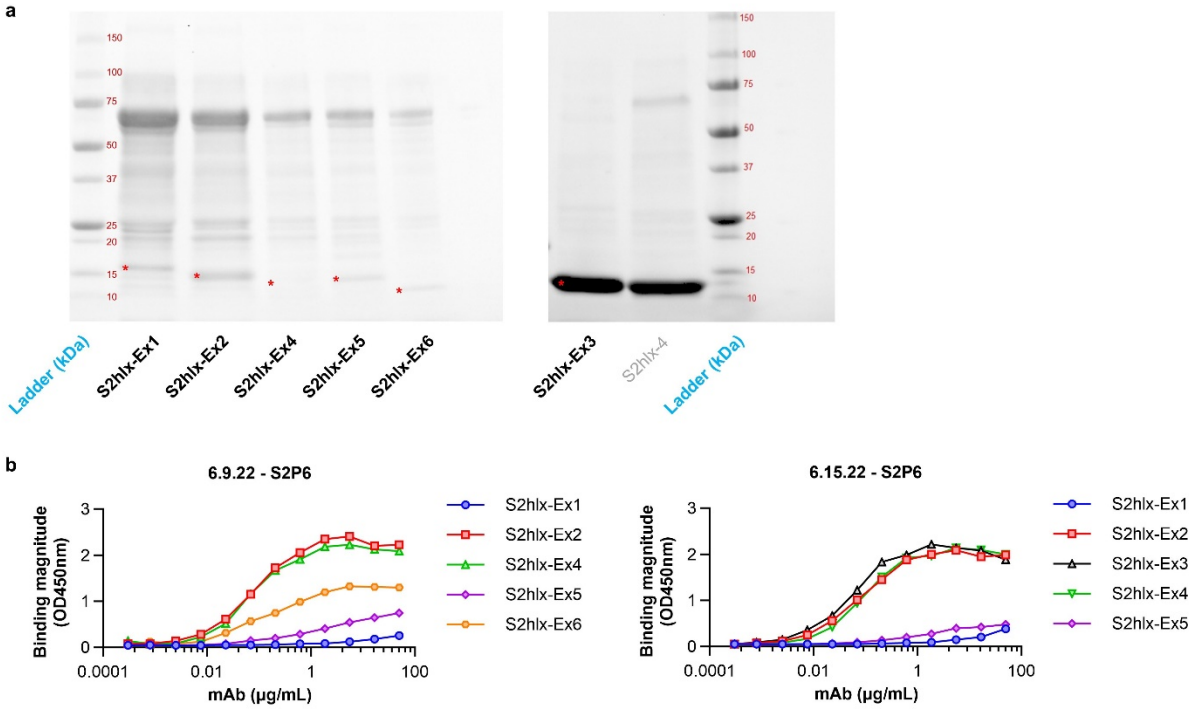

73

74

**Supplementary Figure 10. Recombinant expression and S2P6 mAb binding of**

75

**S2hlx-Ex epitope scaffolds designs generated by backbone grafting. (a) SDS-PAGE gel**

76

showed limited expression of initial S2hlx-Ex epitope scaffolds. \*marks correct MW position for

77

scaffold. Images are representative of at least 2 independent replicates. **(b) Binding of mAb S2P6**

78

to immobilized S2hlx-Ex epitope scaffolds measured by ELISA. Source data are provided as a

79

Source Data file.

80

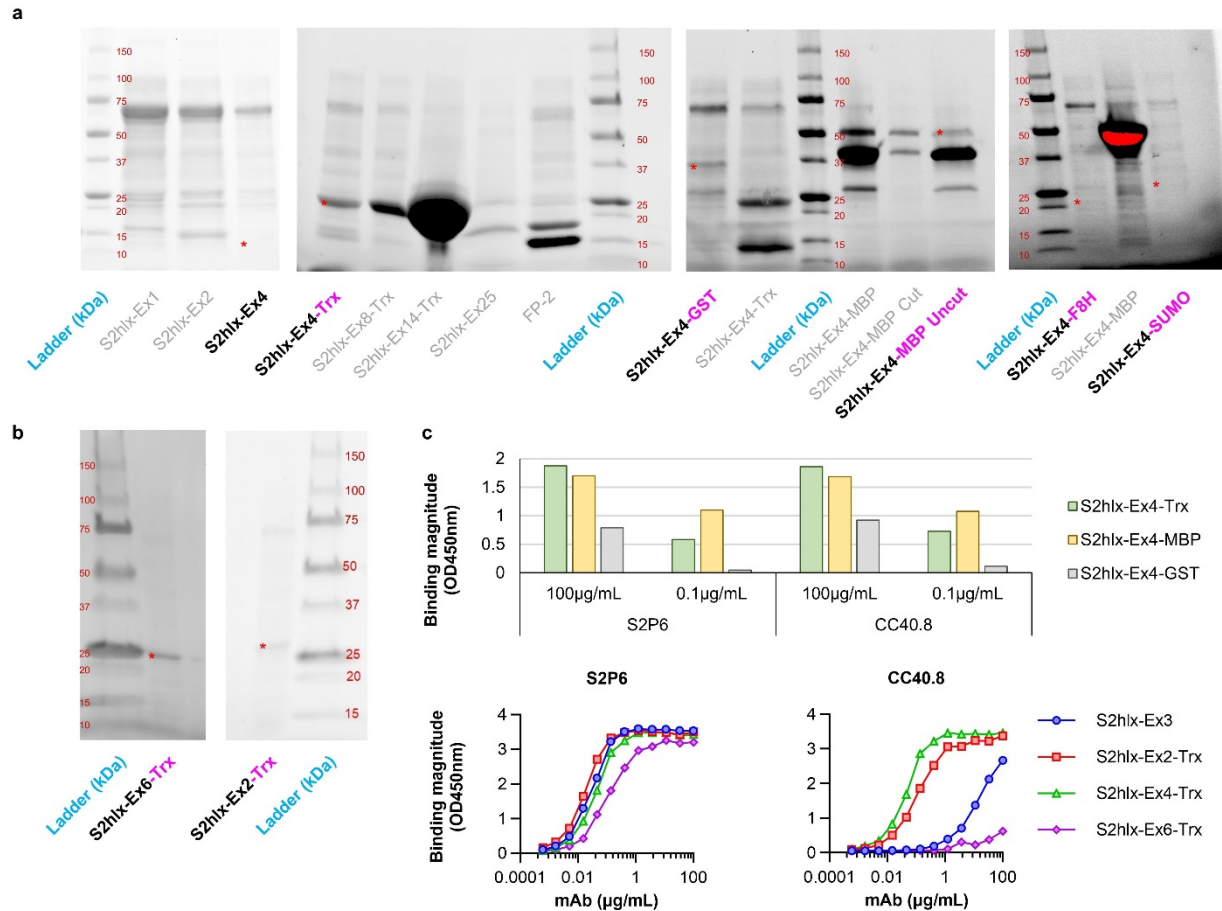

81

82

**Supplementary Figure 11. Tagged S2hlx-Ex epitope scaffolds showed improved**

83

**expression and antibody binding. (a) SDS-PAGE gel showing the expression of the initial**

84

**S2hlx-Ex4 design and of different versions fused to the tags highlighted in *magenta*. Images are**

85

**representative of at least 2 independent replicates. (b) SDS-PAGE gel showing expression of Trx-**

86

**tagged versions of S2hlx-Ex2, Ex4, and Ex6. \* marks expected molecular weight bands. (c)**

87

**Binding of S2P6 and CC40.8 mAbs to tagged S2hlx-Ex epitope scaffolds measured by ELISA.**

88

**Source data are provided as a Source Data file.**

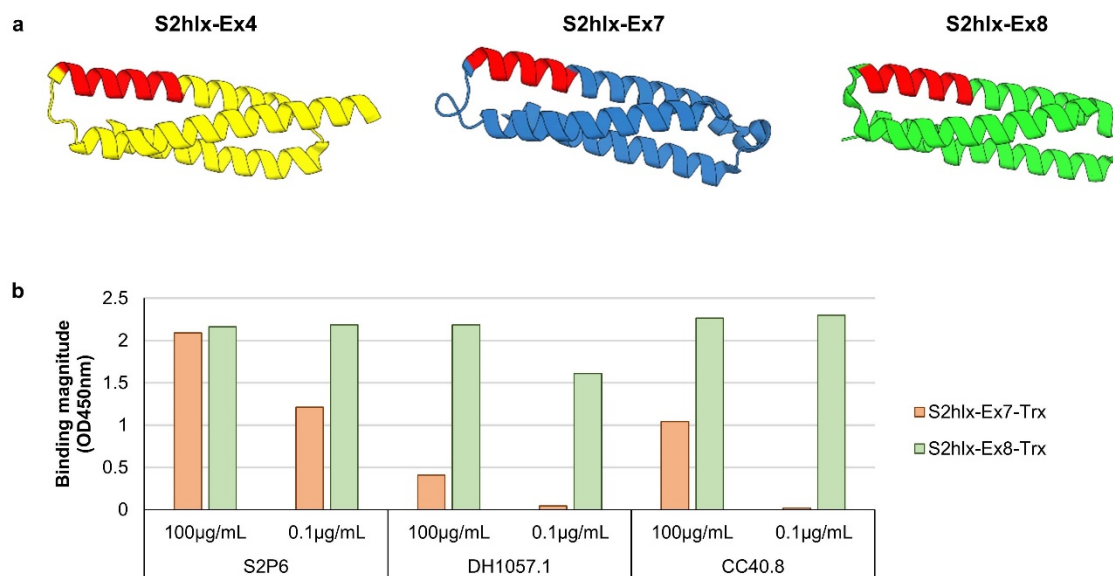

89

90 **Supplementary Figure 12. Binding of epitope scaffolds designed on structural**

91 **homologs of the S2hlx-Ex4 parent scaffold. (a)** Structures of the S2hlx-Ex4 epitope scaffold

92 and of two related designs, S2hlx-Ex7 and S2hlx-Ex8, based on structurally homologous parent

93 scaffolds (PDBids: 2qyw, 1lvf, and 3onj). The grafted epitope is shown in *red*. **(b)** ELISA binding

94 of antibodies S2P6, DH1057, and CC40.8 to tagged epitope scaffolds from **(a)**. Source data are

95 provided as a Source Data file.

96

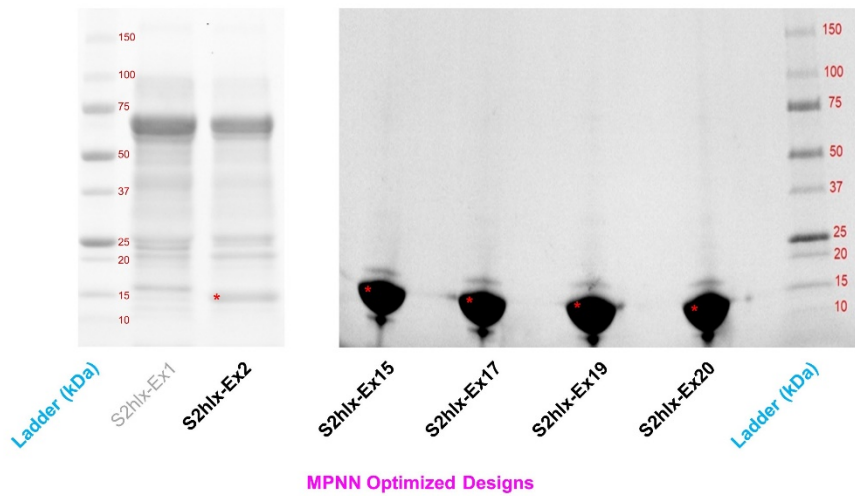

97

98

**Supplementary Figure 13. Expression of S2hlx-Ex2 and related successful MPNN**

99

**designs.** SDS-PAGE gel showing the expression of the initial S2hlx-Ex2 design and of different

100

MPNN versions. \*marks correct MW position for scaffold. Images are representative of at least 2

101

independent replicates. Source data are provided as a Source Data file.

102



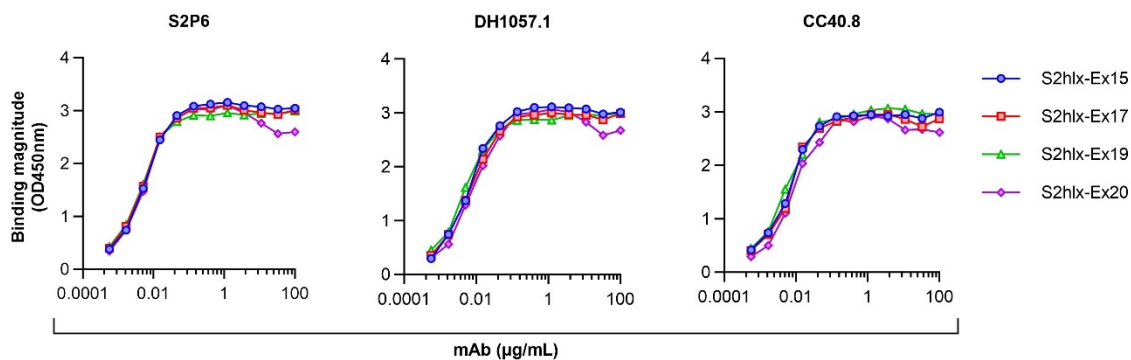

103

104 **Supplementary Figure 14. S2hlx-Ex2 based MPNN designs show broad binding.**

105 Binding of S2P6, DH1057.1 and CC40.8 mAbs to MPNN designs based on S2hlx-Ex2 epitope

106 scaffolds measured by ELISA. Source data are provided as a Source Data file.

107

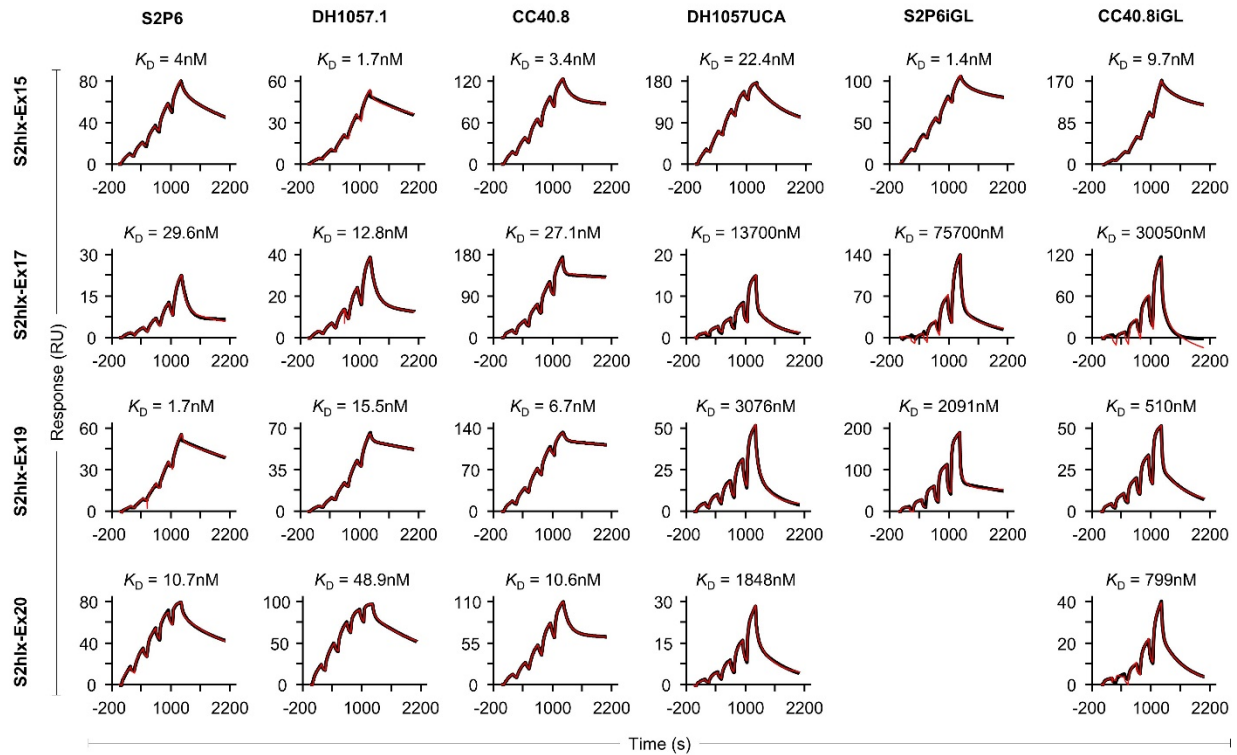

108

109

**Supplementary Figure 15. Surface Plasmon Resonance curves of S2hlx-Ex2 derived**

110

**epitope scaffolds binding to S2P6, S2P6iGL, DH1057.1, DH1057UCA, CC40.8 and**

111

**CC40.8iGL antibodies.** Binding kinetics of S2hlx-Ex2 derived epitope scaffolds to S2P6,

112

DH1057, and CC40.8 mAbs and to their germline variants as measured by Surface Plasmon

113

Resonance (SPR).

114

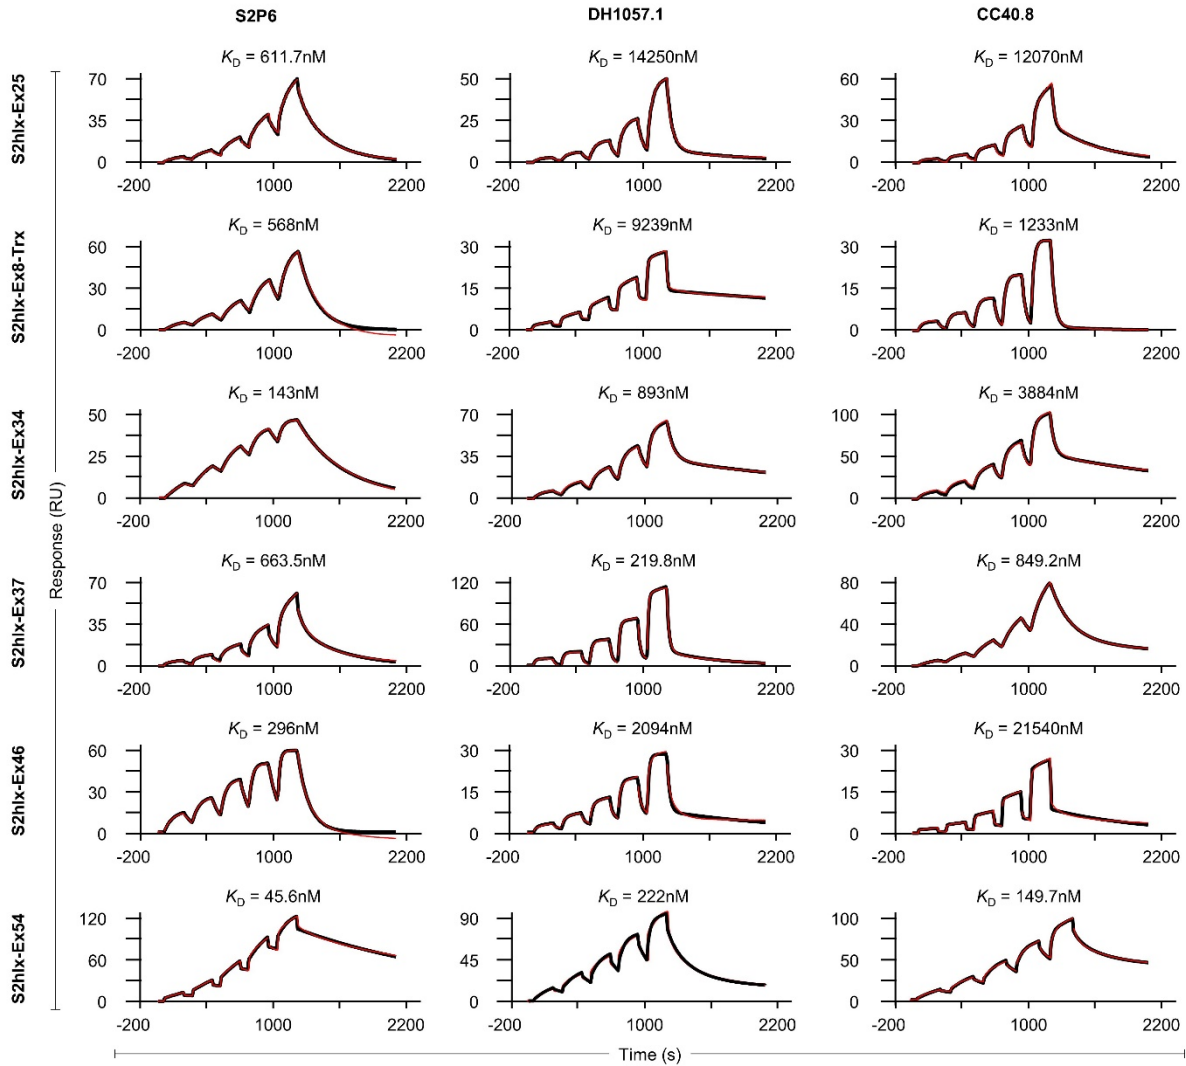

115

116

**Supplementary Figure 16. Binding affinities of S2hlx-Ex4, Ex6, and Ex3 derived**

117

**epitope scaffolds to S2P6, DH1057.1, and CC40.8 mAbs.** Binding kinetics of S2hlx-Ex4, Ex6,

118

and Ex3 derived epitope scaffolds to S2P6, DH1057.1, and CC40.8 as measured by Surface

119

Plasmon Resonance (SPR).

120

a

Stem Helix Epitope scaffolds vs Mature mAbs

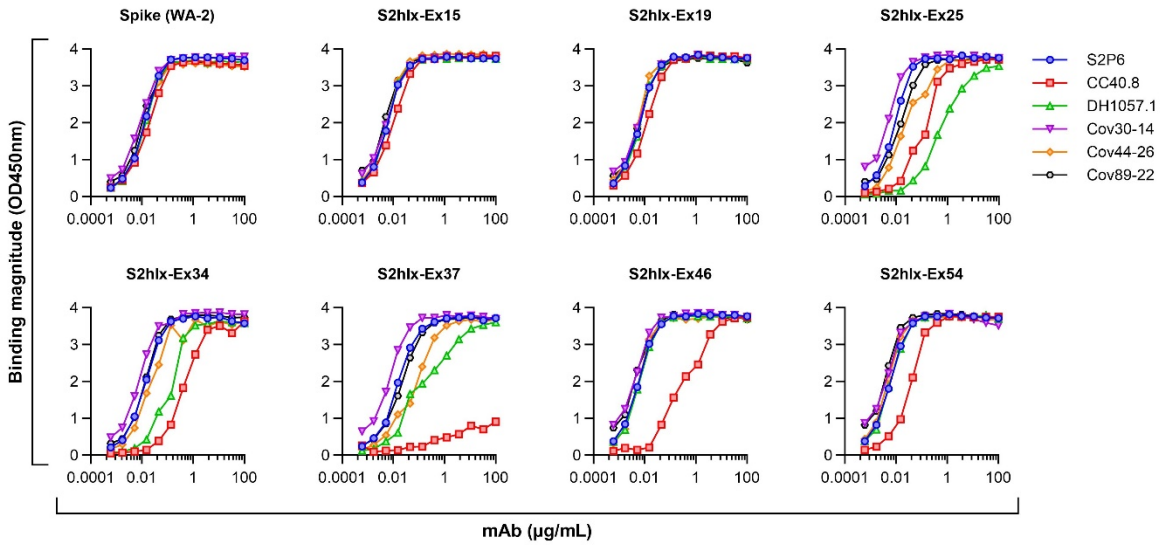

b

Stem Helix Epitope scaffolds vs Germline mAbs

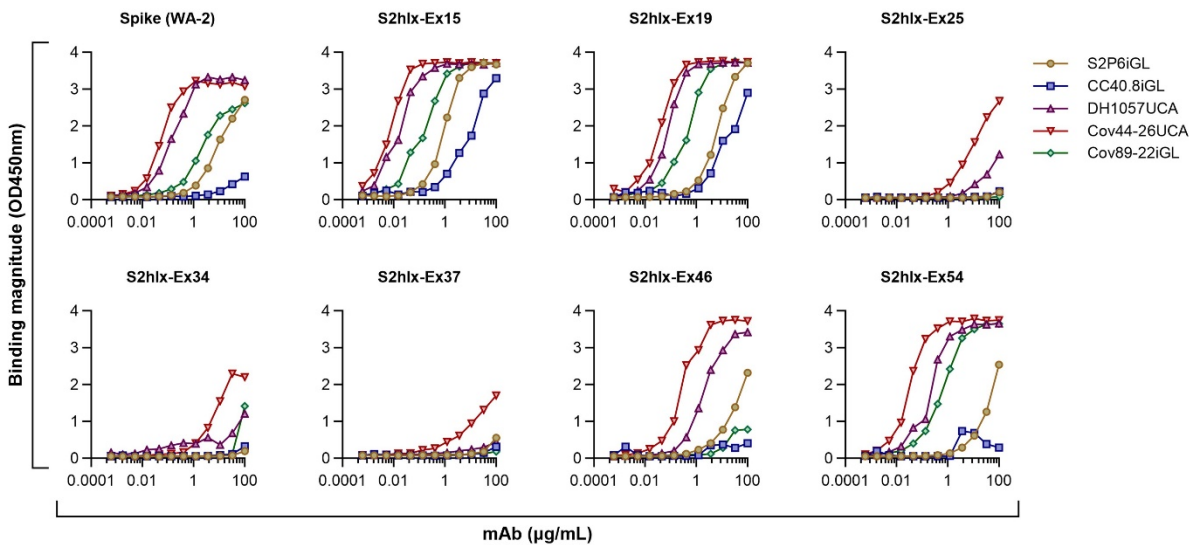

121

122

**Supplementary Figure 17. Epitope scaffolds bind to diverse mature and germline**

123

**antibodies that target the stem helix epitope. (a) ELISA binding of mAbs S2P6, DH1057.1,**

124

**CC40.8, Cov30-14, Cov44-26, and Cov89-22 to S2hlx-Ex ESs and to Spike (WA-2) protein. (b)**

125

**ELISA binding of mAbs S2P6iGL, DH1057UCA, CC40.8iGL, Cov44-26UCA, and Cov89-22iGL to**

126

**S2hlx-Ex ESs and to Spike (WA-2) protein. Source data are provided as a Source Data file.**

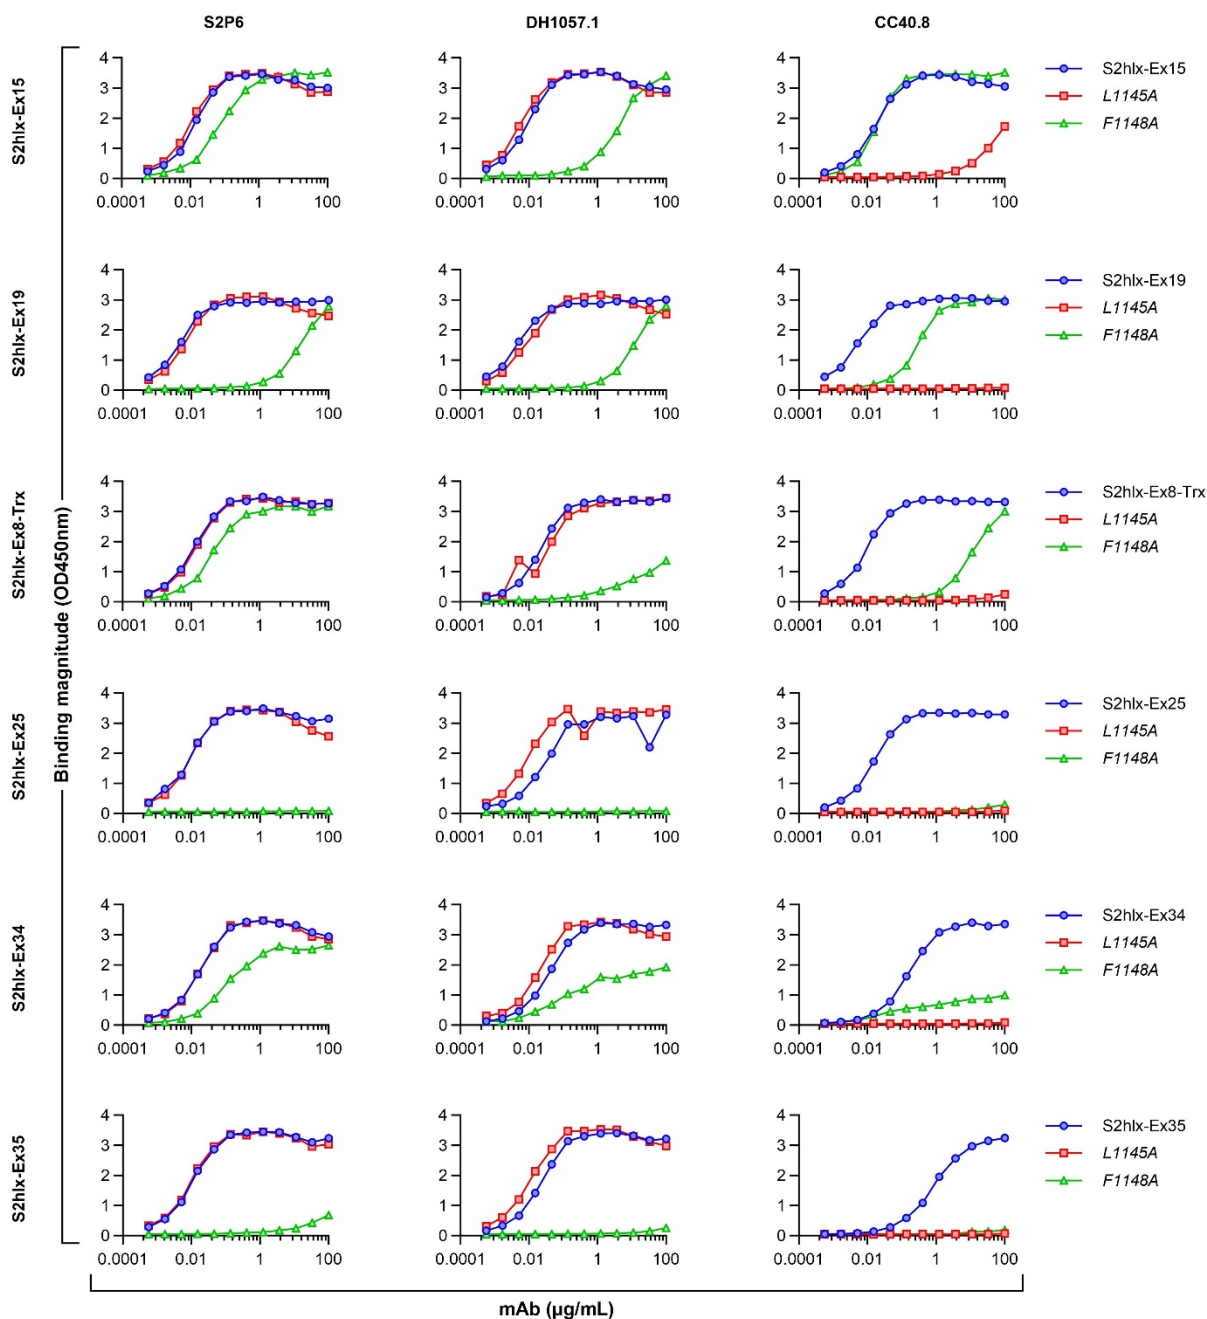

127

128 **Supplementary Figure 18. Binding specificity of S2hlx-Ex epitope scaffolds for**  
 129 **representative epitopes against the stem helix epitope.** Indicated spike mutations known to  
 130 affect the binding of stem helix were introduced in the respective epitope scaffolds. Source data  
 131 are provided as a Source Data file.

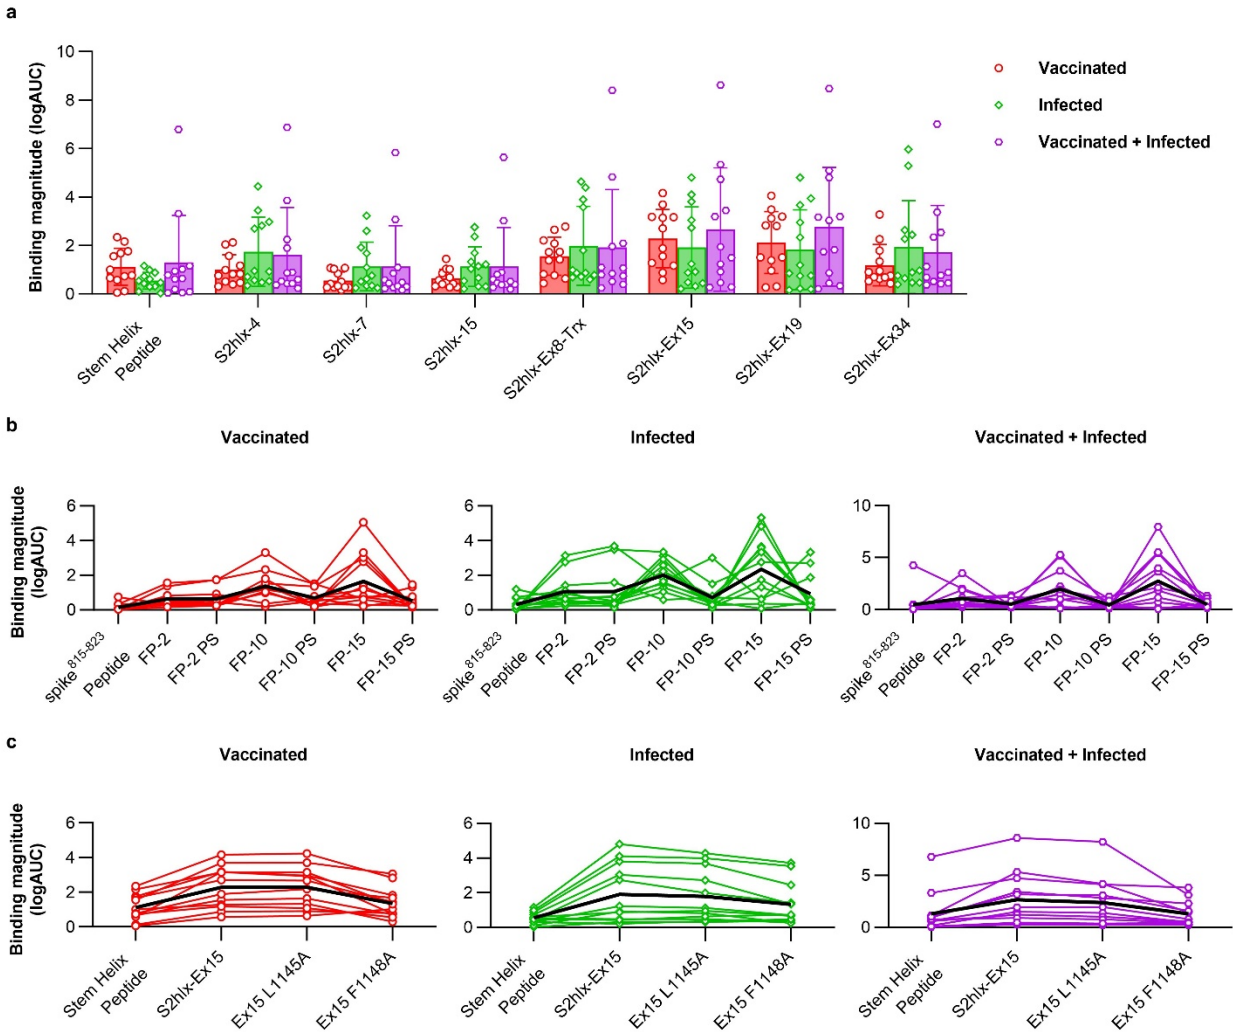

132

133

**Supplementary Figure 19. Reactivity of designed epitope scaffolds to patient sera**

134

**with pre-existing immunity to the SARS-CoV-2 spike. (a)** Binding of stem helix peptide and

135

select S2hlx and S2hlx-Ex epitope scaffolds. Bar plot values represents the mean +/- SD, with

136

the individual samples (n=12 per group) shown in circles. **(b)** Binding of stem helix-

137

Ex15 and S2hlx-Ex15 epitope mutants that reduce binding to either the CC40.8-class of mAbs

138

(LA) or to both the CC40.8 and S2P6 classes of mAbs (FA). **(c)** Binding to spike<sup>815-823</sup> epitope

139

scaffolds and to the parent scaffolds they were derived from and that lack the grafted epitope.

140

Lines represent individual measurements for each sample in the group. Source data are provided

141

as a Source Data file.

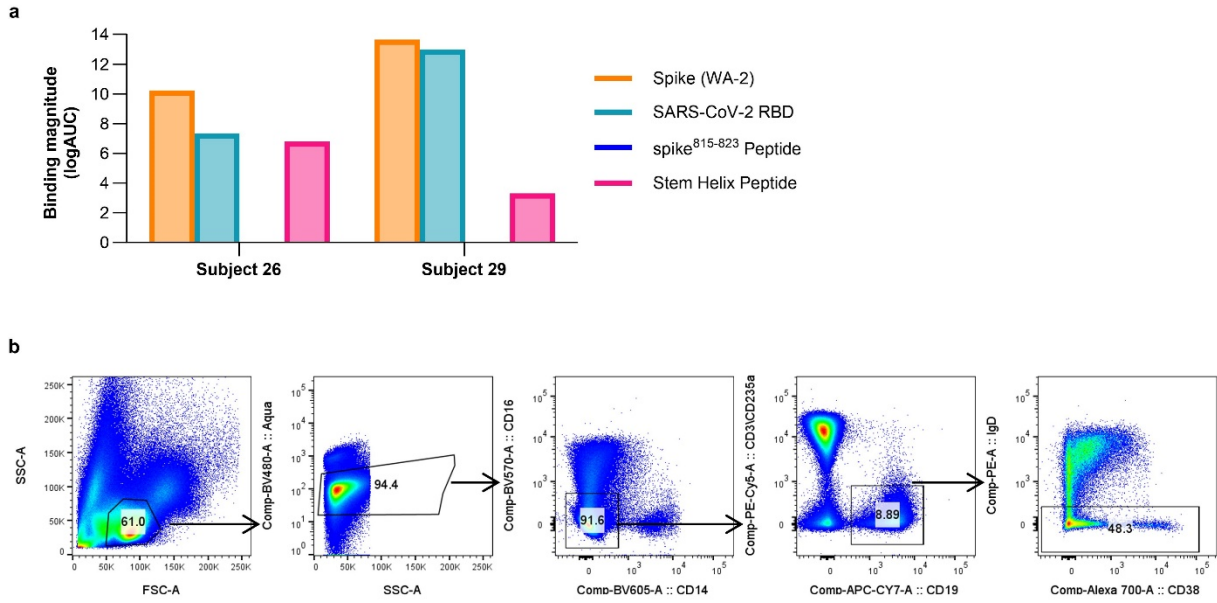

142

143

**Supplementary Figure 20. Isolation of stem helix epitope-specific memory B cells**

144

**from vaccinated then infected subjects with stem helix scaffolds. (a)** ELISA binding of sera

145

from indicated subjects with pre-existing SARS-CoV-2 immunity acquired by vaccination followed

146

by infection to recombinant WA-2 spike and RBD or to synthetic peptides containing the spike<sup>815-</sup>

147

<sup>823</sup> epitope (residues 808-833) or the stem helix (1140-1164). **(b)** Flow cytometric gating strategy

148

for the isolation of memory B cells from PBMCs of subjects. Source data are provided as a Source

149

Data file.

150

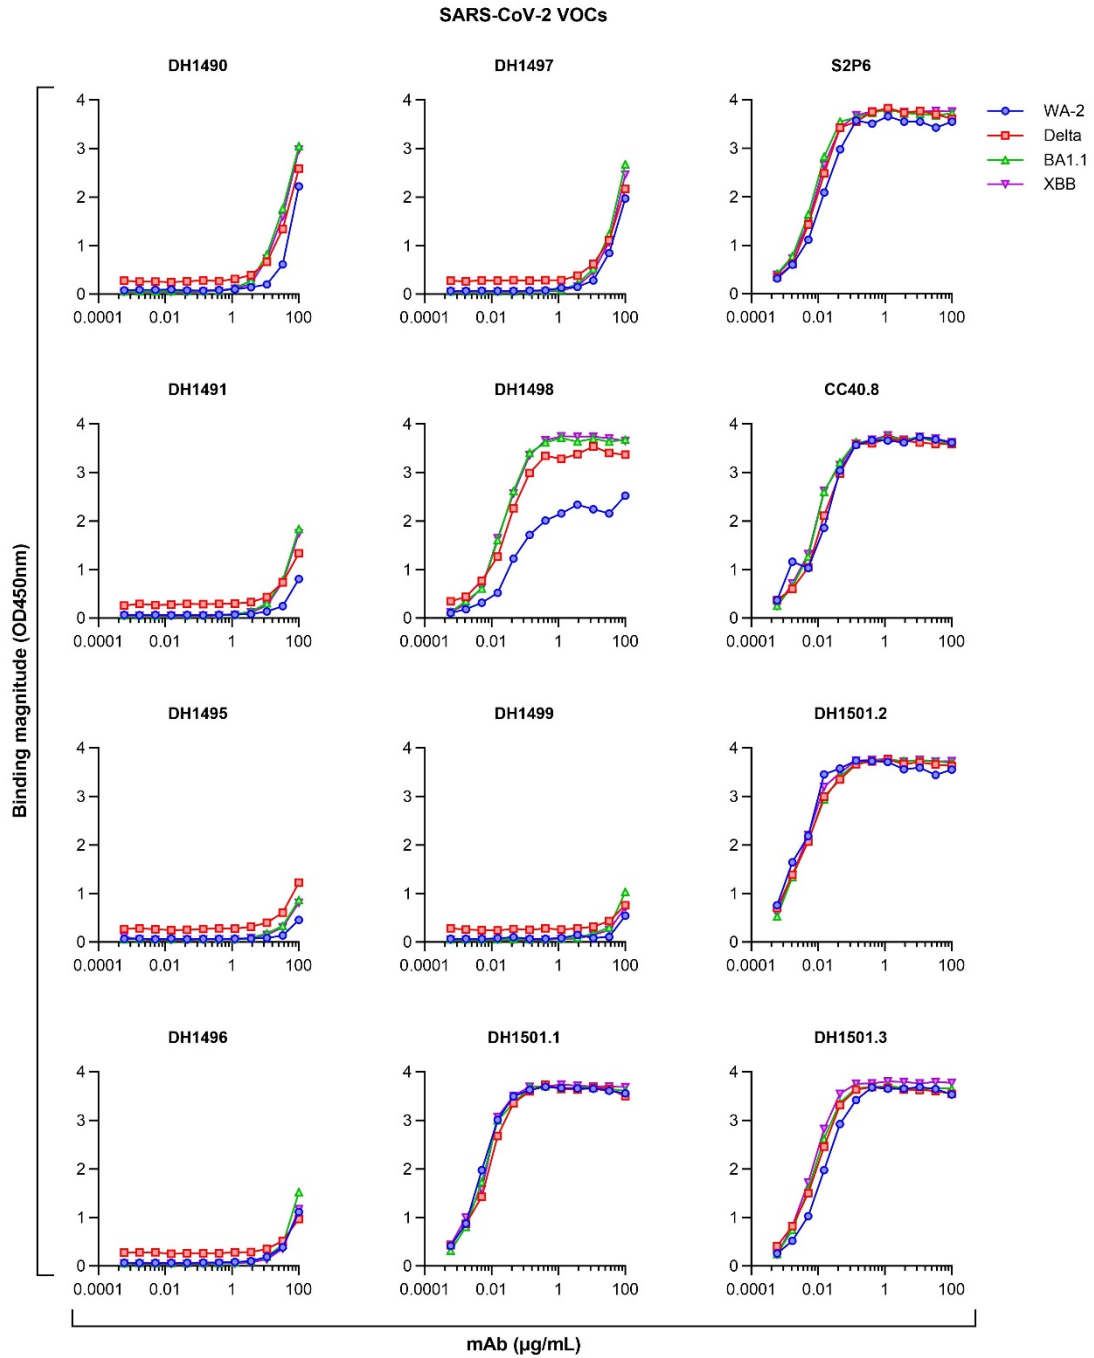

151

152

153

154

**Supplementary Figure 21. ELISA binding of isolated stem helix antibodies to SARS-CoV-2 VOC spikes.** Source data are provided as a Source Data file.



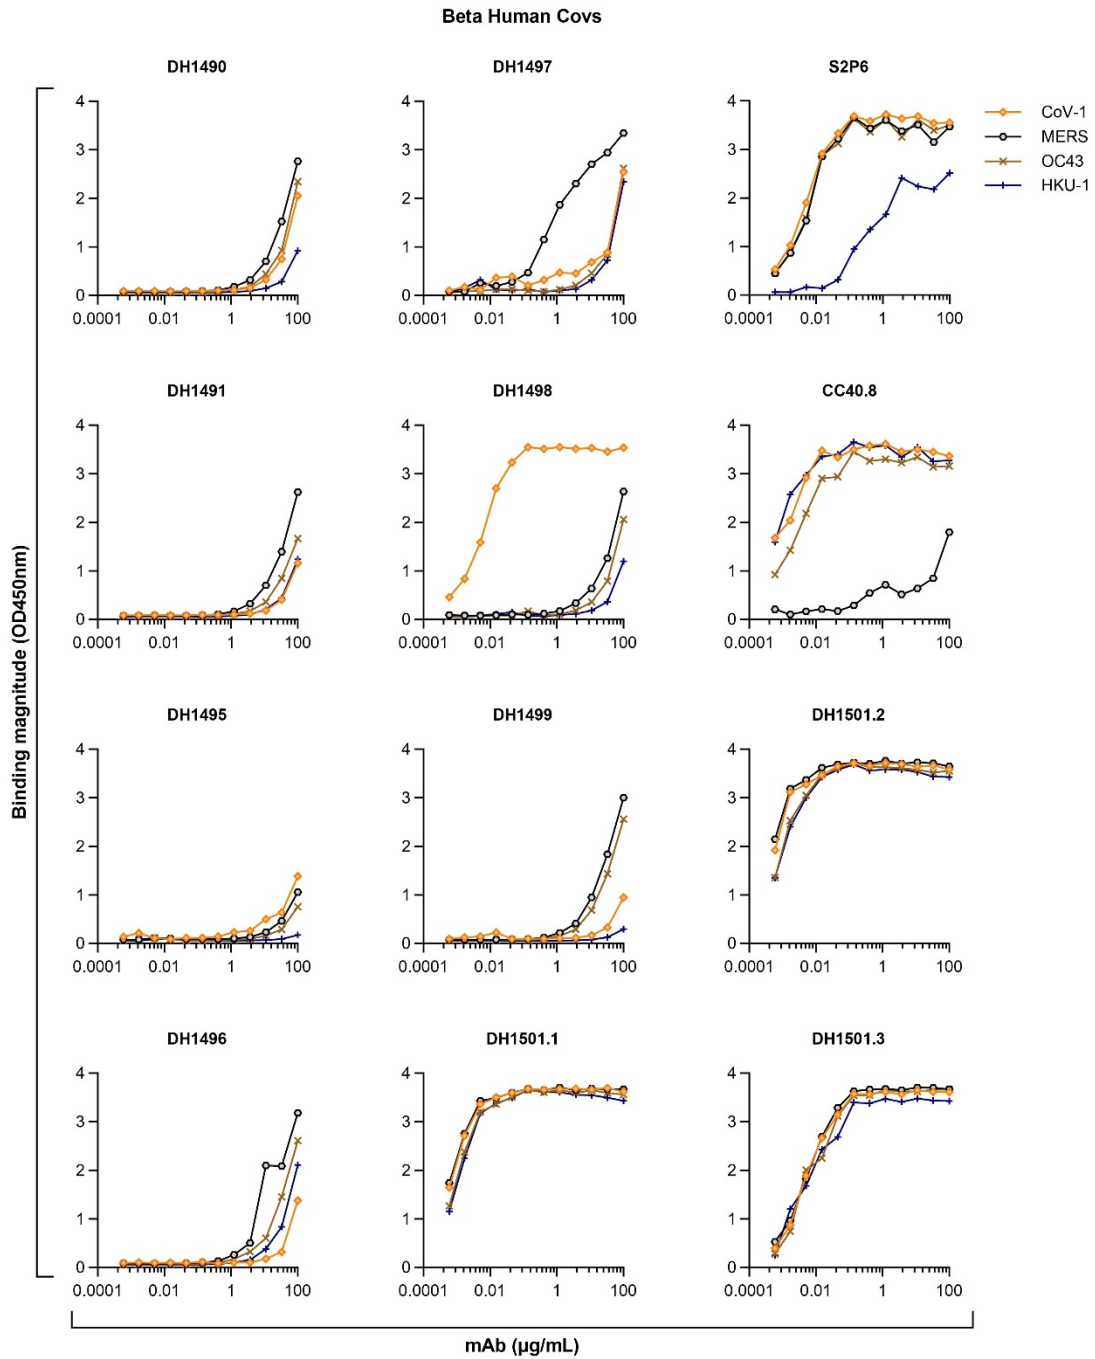

155

156

**Supplementary Figure 22. ELISA binding of isolated stem helix antibodies to human**

157

**betacoronavirus spikes.** Source data are provided as a Source Data file.

158

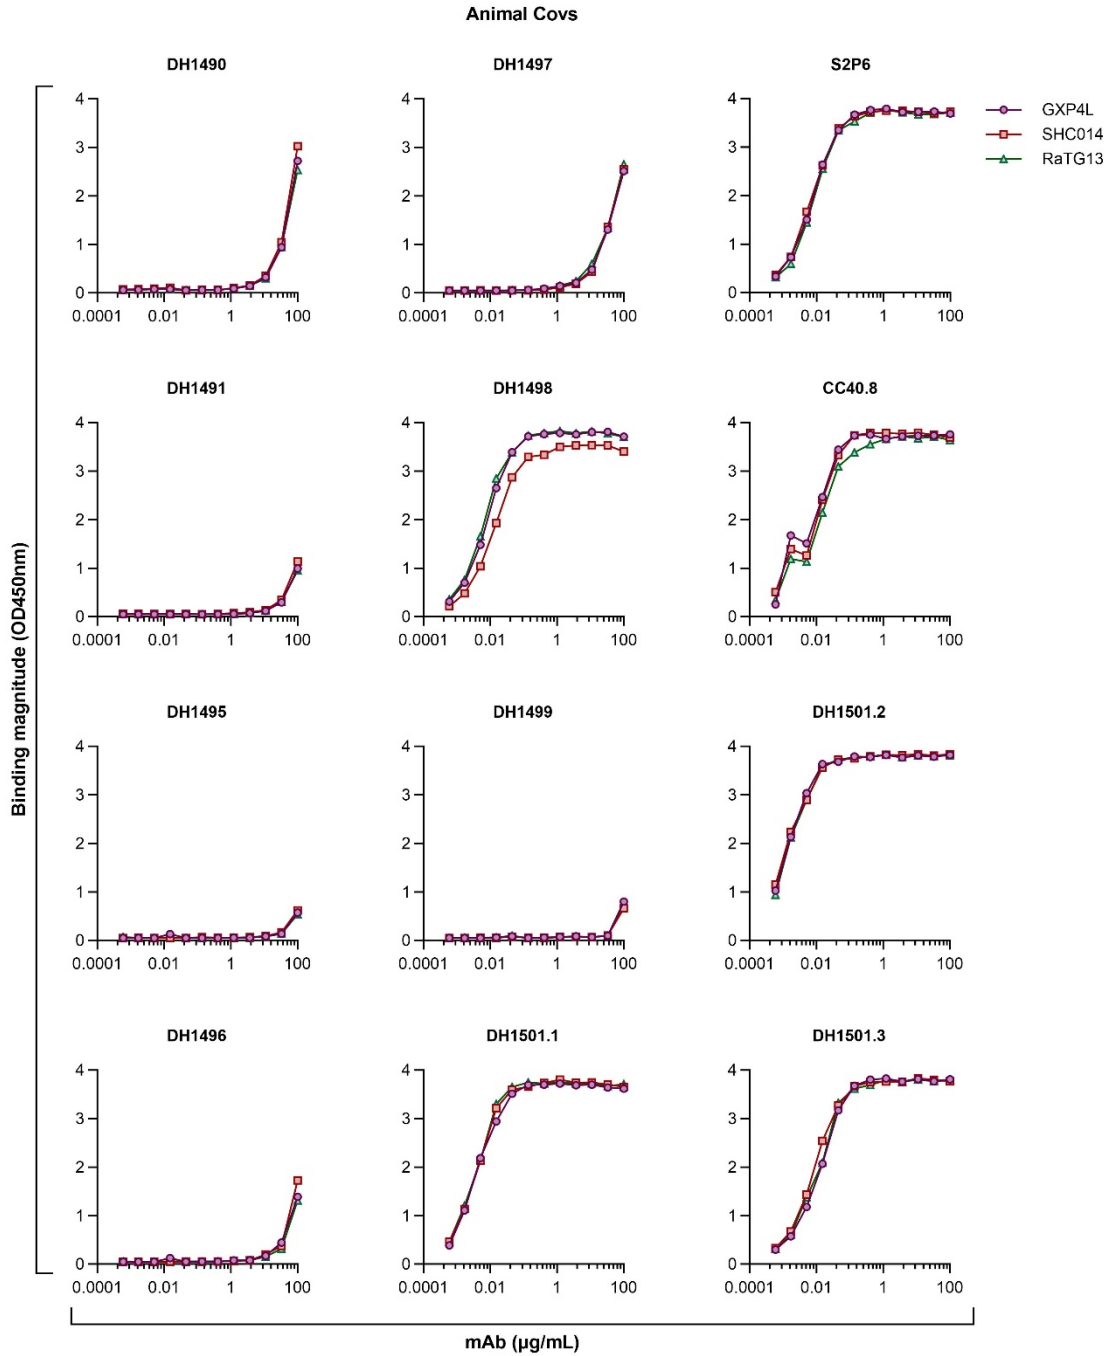

159

160

**Supplementary Figure 23. ELISA binding of isolated stem helix antibodies to animal**

161

**betacoronavirus spikes. Source data are provided as a Source Data file.**

162

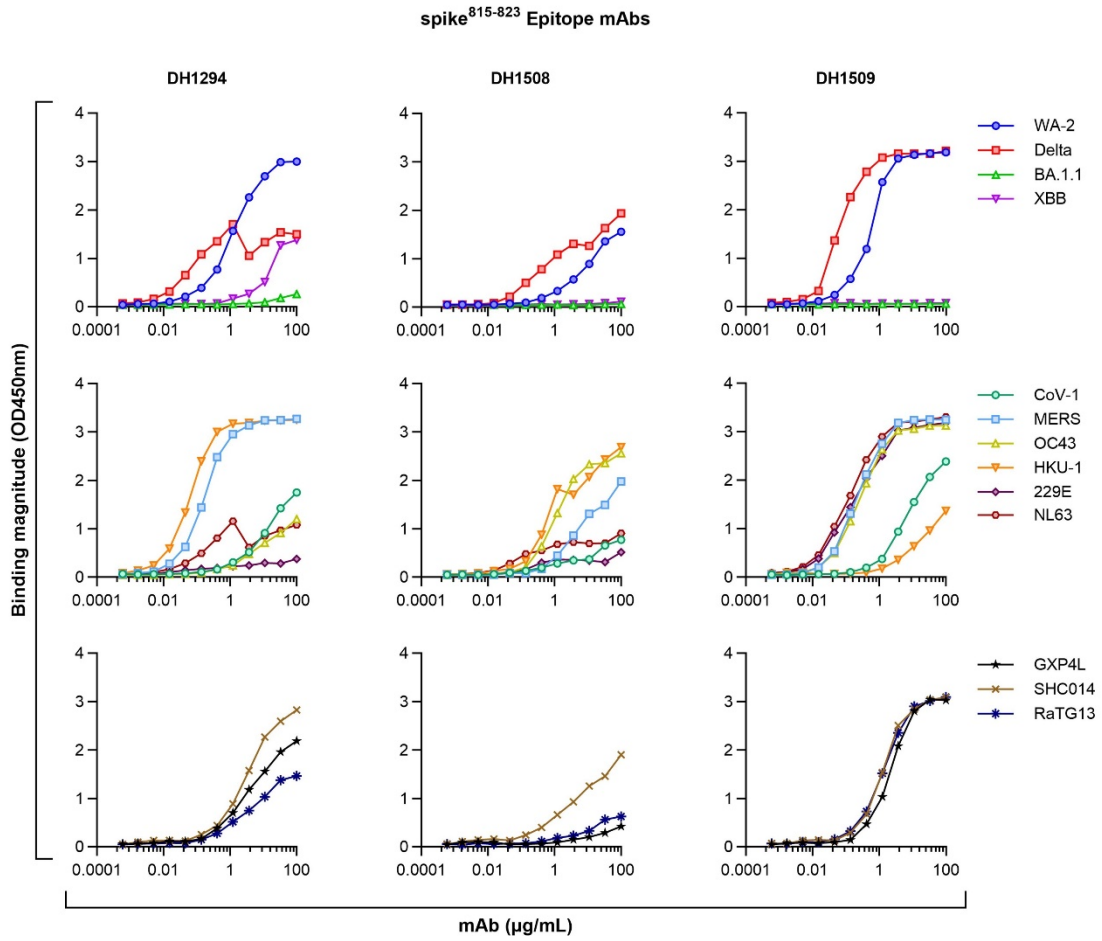

163

164 **Supplementary Figure 24. ELISA binding of isolated spike<sup>815-823</sup> antibodies to human**  
 165 **and animal coronavirus spikes.** Source data are provided as a Source Data file.

166

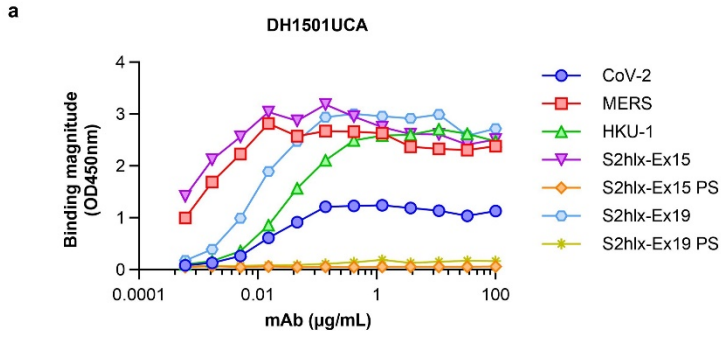

**b**

**Heavy: IGHV1-46\*01 | IGHD1-26\*01 | IGHJ3\*02**

**DH1501UCA** QVQLVQSGAEVKKPKGASVKVSKASGYTFTSYMMHWVRQAPGQGLEWMGIINPSSGGSTSYAQKFKQGRVTMTRDTSTSTIVYMELSSLRSEDVAVYICARMSRYGAFDINGQGTMTVTVSS  
DH1501.3 .....RL.....D...NE.VQ.....L.....SG.AF.RN.....S.....R...D.T...Y.....A.T..L.....  
DH1501.1 E....E.....R.....F...DH.....L...T.VN.F...N.R.....K.D.L.VR...T.Q...M.....L  
DH1501.2 E....E.....RL.....D...NNK.V.....L.....SG.AF.....S.....R...LG.T...TY.....A.T...D.....

**Light: IGKV3-20\*01 | IGKJ2\*01**

**DH1501UCA** EIVLTQSPGTLTSLSPGERATLSCRASQSVSSSYLAWYQQKPKGQAPRLLIYGASSRATGIPDRFSGSGSGTDFTLTISRLEPEDFAVYQCQQYGGSSPPRYTFGQGTKLEIK  
DH1501.3 .....D.....L.....F...ETID.R.....R.....MS.T.V.....T.....AM.  
DH1501.1 .....G.G.....V.....S...N.V.....M...N.....  
DH1501.2 .....D.....EN.GT.....S.T.....V.....R.....DM.

167

168 **Supplementary Figure 25. The unmutated common ancestor (UCA) of isolated stem**

169 **helix antibodies DH1501.1, DH1501.2, and DH1501.3, binds to multiple human coronavirus**

170 **spikes. (a) ELISA binding data. (b) Sequence alignment between the UCA and the mature**

171 **antibodies. Source data are provided as a Source Data file.**

172

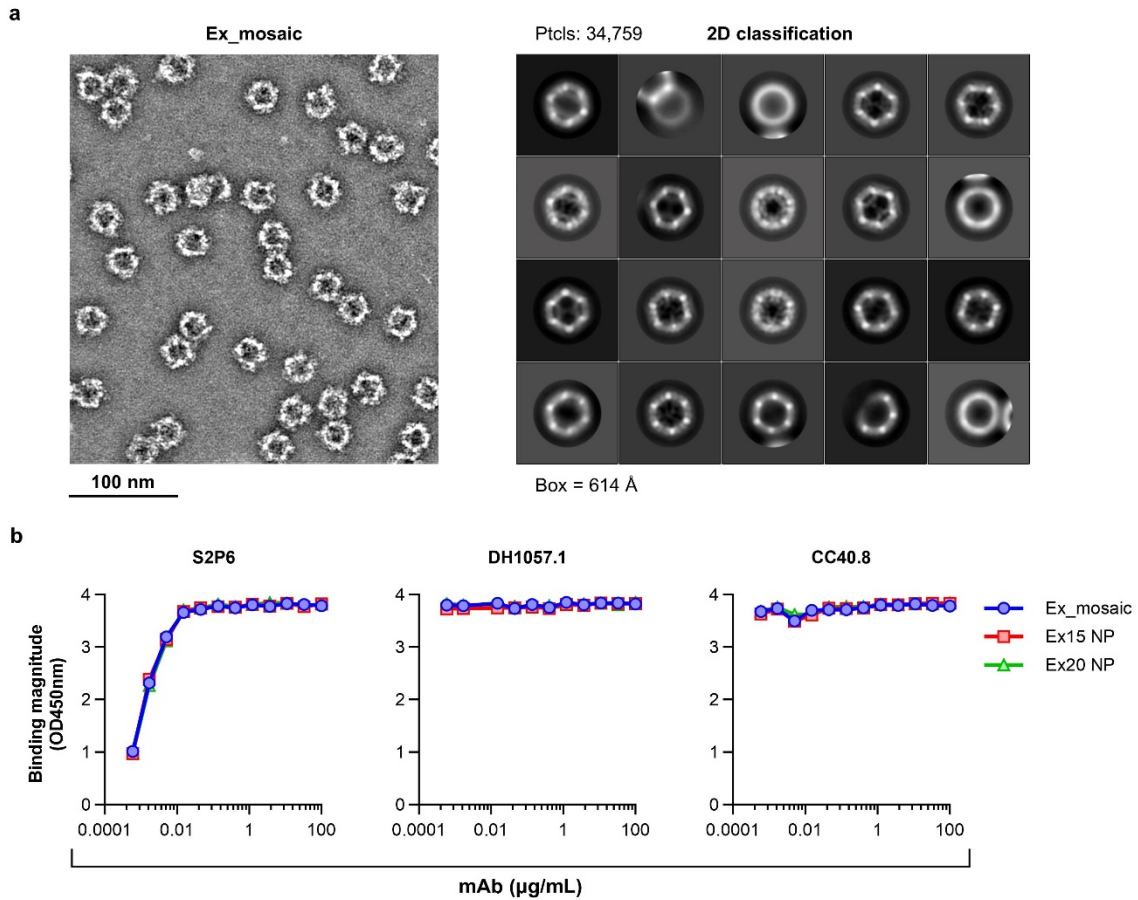

173

174 **Supplementary Figure 26. Characterization of epitope scaffold nanoparticles. (a)**

175 NSEM sample image and 2D classification of the Ex\_mosaic NP. **(b)** ELISA binding of mi03

176 nanoparticles displaying the indicated epitope scaffolds to stem helix antibodies S2P6, DH1057.1

177 and CC40.8. Source data are provided as a Source Data file.

178

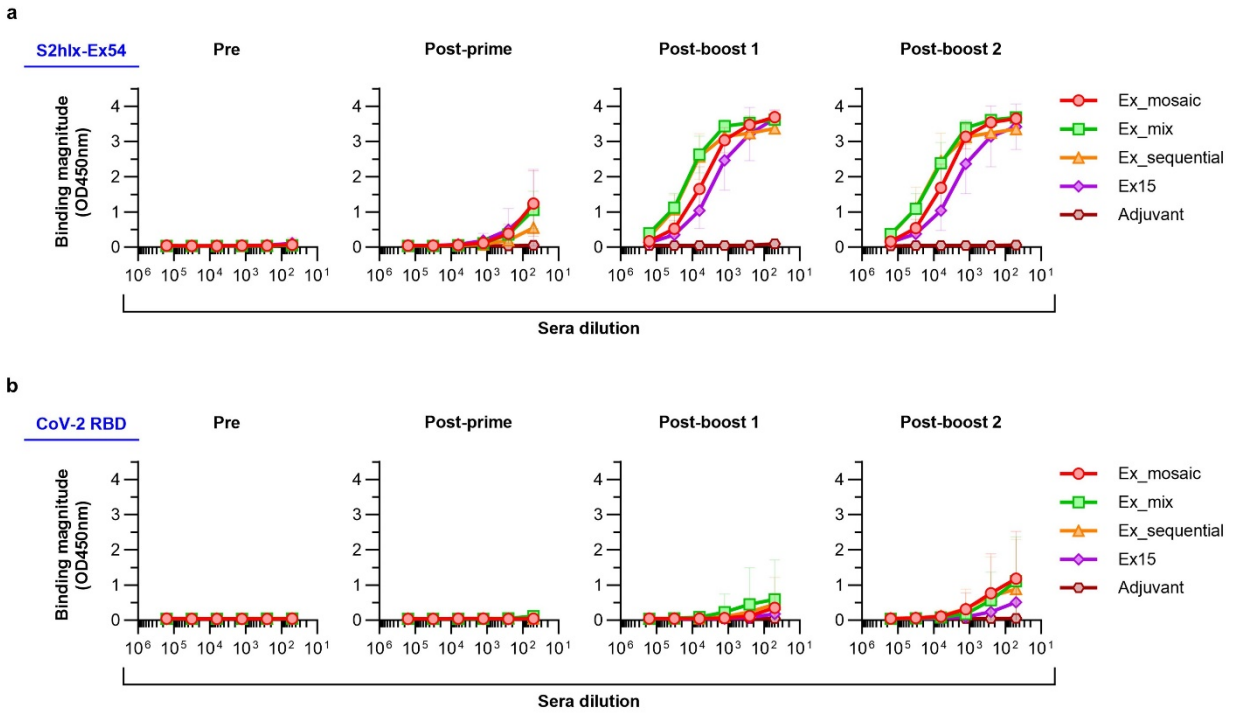

179

180 **Supplementary Figure 27. Binding of sera from *BALBc* immunized mice with stem**  
 181 **helix epitope scaffold nanoparticles to an epitope scaffold not used in the immunization**

182 **and the RBD. (a) sera binding at indicated time points to a stem helix epitope scaffold S2hlx-**  
 183 **Ex54. (b) sera binding at indicated time points to the RBD. Data are presented as the mean.**

184 Source data are provided as a Source Data file.

185

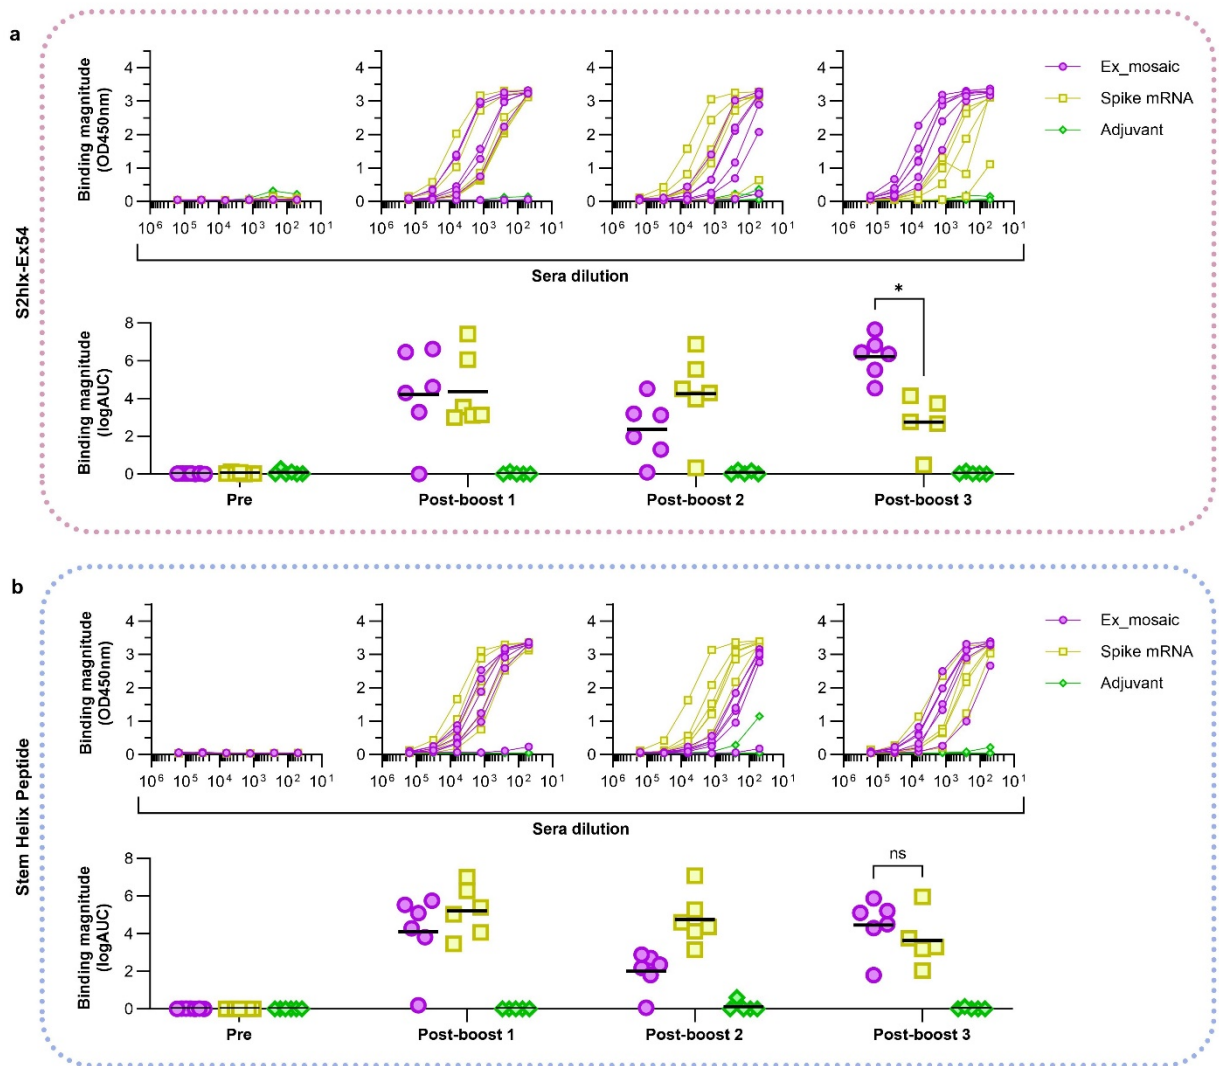

186

187

**Supplementary Figure 28. Stem helix epitope specific binding of sera from K18-**

188

**ACE2 mice primed with spike mRNA and boosted with either the epitope scaffold mosaic**

189

**NP or spike mRNA. (a) sera binding at indicated time points to a stem helix epitope scaffold not**

190

**used in the immunizations (S2hlx-Ex54). (b) sera binding at indicated time points to a synthesized**

191

**peptide encoding the stem helix epitope. Data are presented as the mean. Data points correspond**

192

**to individual animals. F was calculated by two-way ANOVA using Geisser-Greenhouse correction**

193

**and comparisons using Tukeys test. ns=not significant; \* p=0.015. Source data are provided as a**

194

**Source Data file.**
